# Supplementary material for: Experimental visualization of covalent bonds and structural disorder in a gallium zinc oxynitride photocatalyst (Ga1−xZnx)(N1−xOx): origin of visible light absorption
Source: Royal Society of Chemistry journal article supplement (doi:10.1039/b922008a), 2010-01-01
Supplement: b922008a.pdf [file b922008a.pdf]

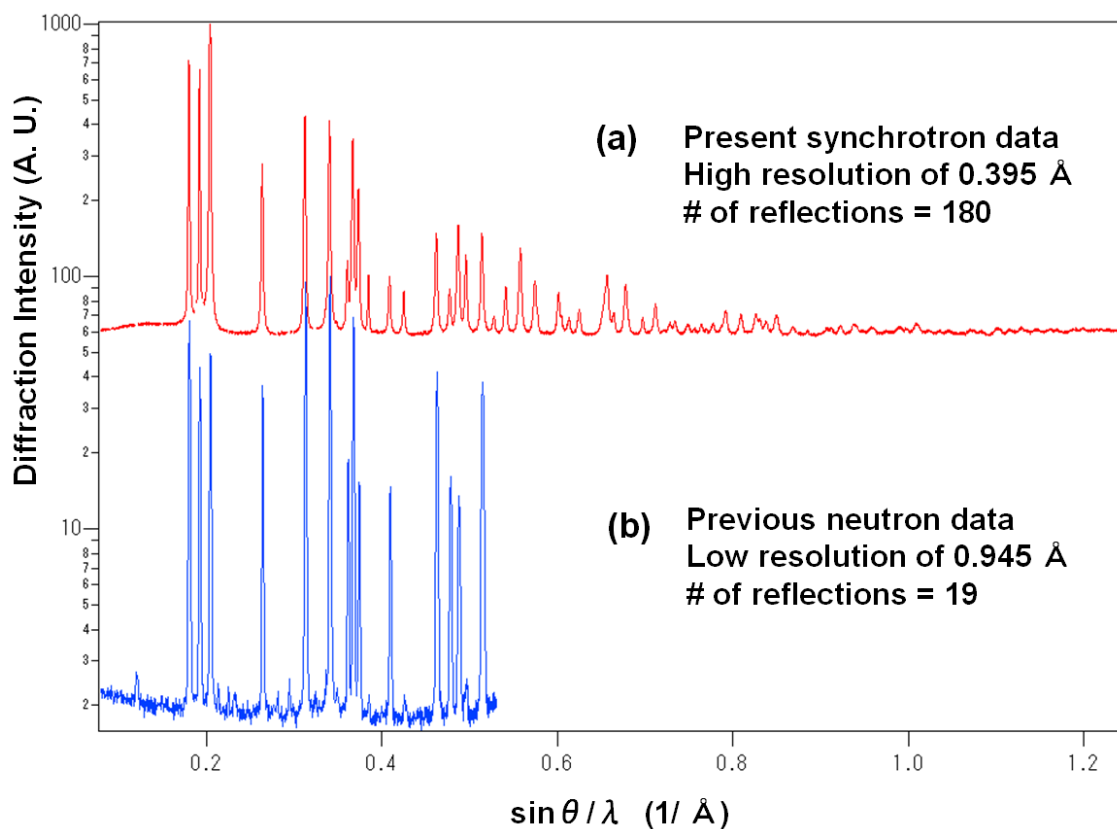

**Figure S1.** Comparison of (a) the present synchrotron powder diffraction data of  $(\text{Ga}_{0.885}\text{Zn}_{0.115})(\text{N}_{0.885}\text{O}_{0.115})$  (Higher resolution of 0.395 Å, Wavelength of incident X-ray = 0.49942 Å) and (b) previous neutron powder diffraction data (Lower resolution of 0.945 Å, Wavelength of neutron beam = 1.82035 Å). The number of observed reflections (180) in this work is much larger than that (19) in the previous work [Ref. 1], which enables the detailed analysis of structural disorder in  $(\text{Ga}_{0.885}\text{Zn}_{0.115})(\text{N}_{0.885}\text{O}_{0.115})$ .

[Ref. 1] Yashima, M. *et al. Chem. Phys. Lett.* **2005**, 416, 225-228.

Electronic Supplementary Information

Authors: Masatomo Yashima, Hiroki Yamada, Kazuhiko Maeda, Kazunari Domen

Title: Experimental Visualization of Covalent Bonds and Structural Disorder in a Gallium Zinc Oxynitride Photocatalyst ( $\text{Ga}_{1-x}\text{Zn}_x$ )( $\text{N}_{1-x}\text{O}_x$ ), Origin of Visible Light Absorption

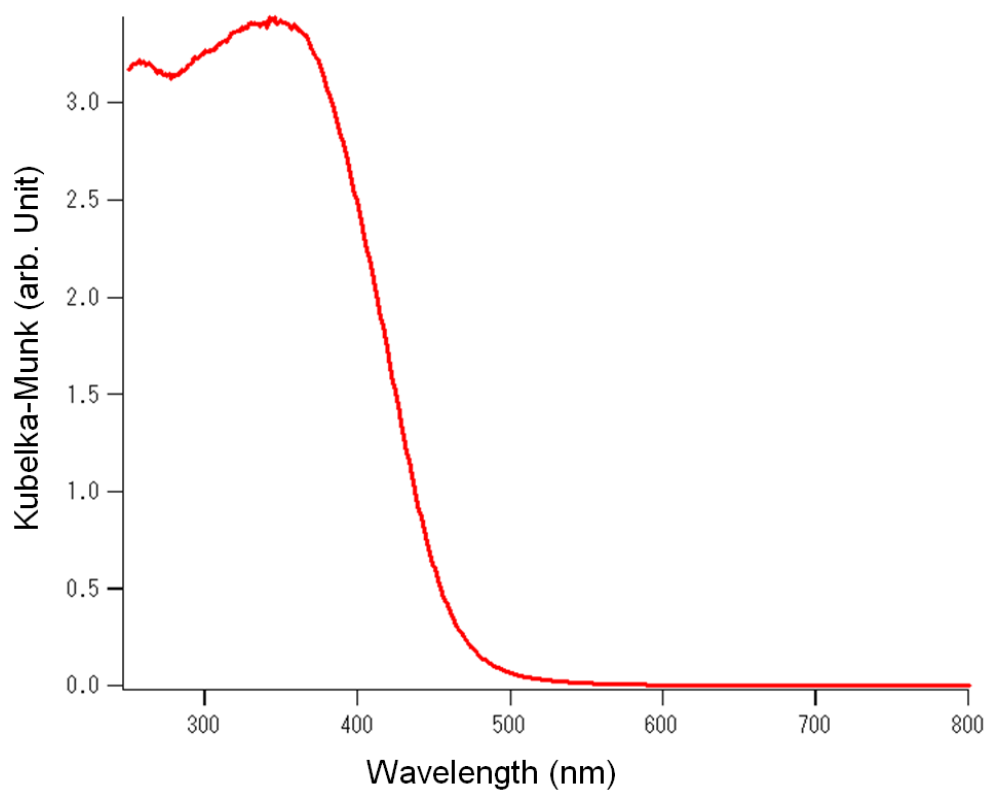

**Figure S2.** UV-visible diffuse reflectance spectrum of  $(\text{Ga}_{0.885}\text{Zn}_{0.115})(\text{N}_{0.885}\text{O}_{0.115})$ . The band gap was estimated to be 2.7 eV from this figure.

## Electronic Supplementary Information

Authors: Masatomo Yashima, Hiroki Yamada, Kazuhiko Maeda, Kazunari Domen

Title: Experimental Visualization of Covalent Bonds and Structural Disorder in a Gallium Zinc Oxynitride Photocatalyst ( $\text{Ga}_{1-x}\text{Zn}_x$ )( $\text{N}_{1-x}\text{O}_x$ ), Origin of Visible Light Absorption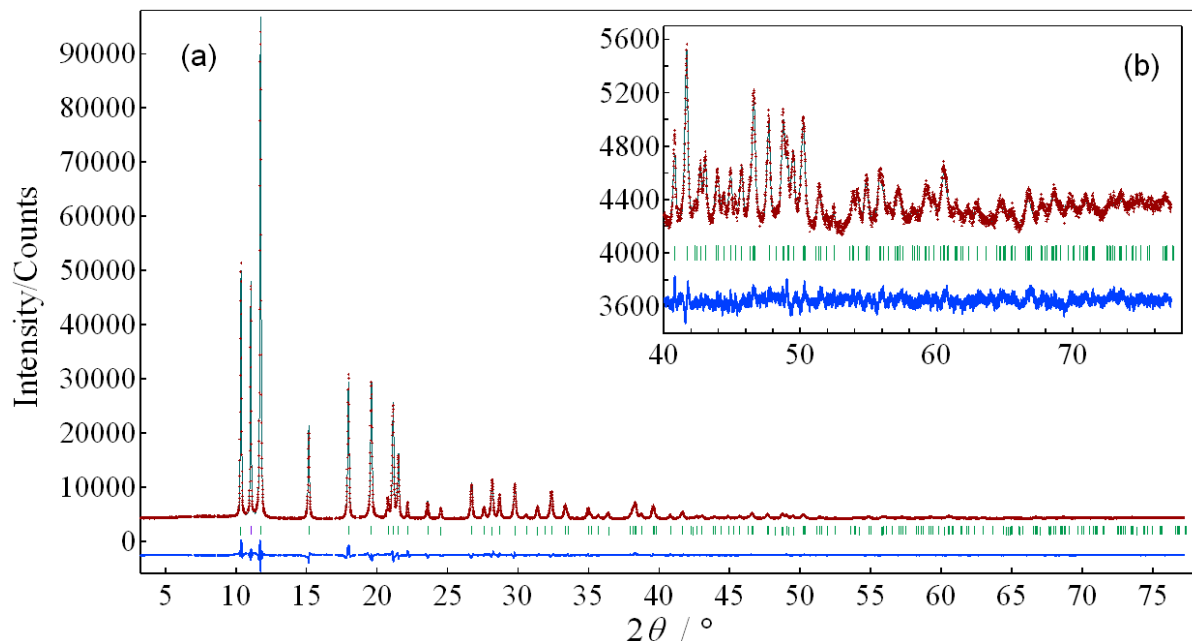

**Figure S3.** (a) Rietveld pattern for the non-split-atom model for synchrotron powder diffraction data of  $(\text{Ga}_{0.885}\text{Zn}_{0.115})(\text{N}_{0.885}\text{O}_{0.115})$  at 305 K. Red plots denote observed data, green line denotes calculated profiles, and blue line denotes the difference. Vertical lines indicate possible Bragg peaks of the hexagonal  $(\text{Ga}_{0.885}\text{Zn}_{0.115})(\text{N}_{0.885}\text{O}_{0.115})$  phase. Wavelength of incident X-ray is 0.49942 Å. Inset (b) is the enlargement of the higher angle region.

**Table S1.** Refined crystallographic parameters and reliability factors in the Rietveld analysis of synchrotron X-ray powder diffraction data of  $(\text{Ga}_{0.885}\text{Zn}_{0.115})(\text{N}_{0.885}\text{O}_{0.115})$  (305 K). Anions were put at single 1/3, 2/3, 0 site (non-split-atom model).

| Atom  | Site       | Atomic coordinates |          |          |           |
|-------|------------|--------------------|----------|----------|-----------|
|       |            | Occupancy          | <i>g</i> | <i>x</i> | <i>y</i>  |
| Ga,Zn | 2 <i>b</i> | 1.0                | 1/3      | 2/3      | 0.3756(4) |
| N     | 2 <i>b</i> | 0.885              | 1/3      | 2/3      | 0.0       |
| O     | 2 <i>b</i> | 0.115              | 1/3      | 2/3      | 0.0       |

Unit cell: hexagonal  $P6_3mc$ ,  $a = b = 3.19833(3)$  Å,  $c = 5.19217(5)$  Å,  $\alpha = \beta = 90^\circ$ ,  $\gamma = 120^\circ$ ,  $V = 45.9966(8)$  Å<sup>3</sup>.

Atomic displacement parameters:  $U(\text{Ga}) = U(\text{Zn}) = U(\text{N}) = U(\text{O}) = 0.0063(2)$  Å<sup>2</sup>

$R_{\text{wp}} = 1.90$  %, GOF = 1.35,  $R_1 = 1.77$  %,  $R_F = 1.16$  %

Wavelength = 0.49942 Å

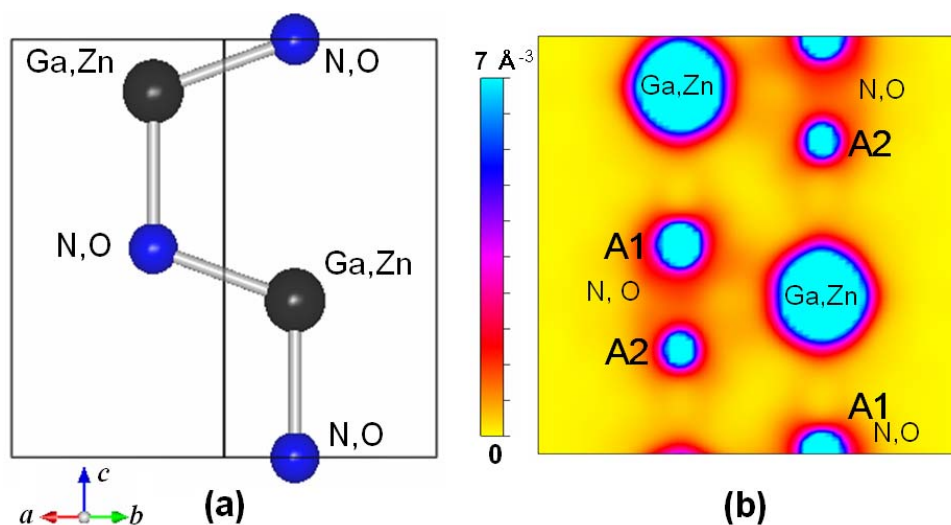

**Figure S4.** (a) Projection of refined crystal structure of  $(\text{Ga}_{0.885}\text{Zn}_{0.115})(\text{N}_{0.885}\text{O}_{0.115})$  on the (110) plane. (b) Electron-density distribution on the (110) plane of  $(\text{Ga}_{0.885}\text{Zn}_{0.115})(\text{N}_{0.885}\text{O}_{0.115})$ . A1 and A2 are the split sites of anions. Structure refinement is performed with a non-split-atom model.

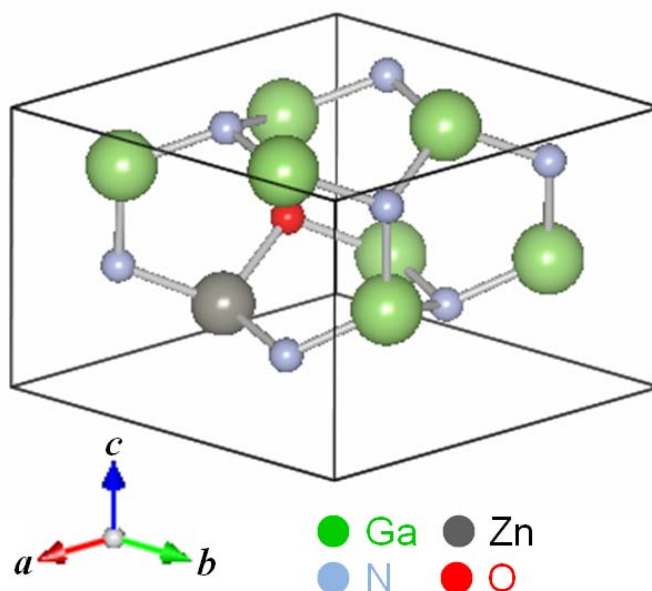

**Figure S5.**  $2 \times 2 \times 1$  supercell of the hexagonal GaN-ZnO phase,  $(\text{Ga}_7\text{Zn})(\text{N}_7\text{O})$ , which was optimized by the DFT calculations. There exist seven Ga, one Zn, seven N and one O atoms in the supercell. Details of the DFT calculations are described below. CIF file of this structure is shown in Table S2.

Electronic Supplementary Information

Authors: Masatomo Yashima, Hiroki Yamada, Kazuhiko Maeda, Kazunari Domen

Title: Experimental Visualization of Covalent Bonds and Structural Disorder in a Gallium Zinc Oxynitride Photocatalyst ( $\text{Ga}_{1-x}\text{Zn}_x(\text{N}_{1-x}\text{O}_x)$ ), Origin of Visible Light Absorption

**Table S2.** CIF file for the optimized ( $\text{Ga}_7\text{Zn}$ )( $\text{N}_7\text{O}$ ).

\_chemical\_formula\_sum 'Ga7N7OZn'

\_symmetry\_space\_group\_name\_H-M 'P1'

\_symmetry\_Int\_Tables\_number 1

\_cell\_length\_a 6.32426

\_cell\_length\_b 6.29318

\_cell\_length\_c 5.44533

\_cell\_angle\_alpha 89.98

\_cell\_angle\_beta 90.12

\_cell\_angle\_gamma 120.21

\_cell\_volume 187.28

\_cell\_formula\_units\_Z 1

loop\_

\_atom\_site\_label

\_atom\_site\_symmetry\_multiplicity

\_atom\_site\_Wyckoff\_symbol

\_atom\_site\_fract\_x

\_atom\_site\_fract\_y

\_atom\_site\_fract\_z

\_atom\_site\_occupancy

Ga 1 a 0.15354 0.32274 0.29761 1.0

Ga 1 a 0.33806 0.17461 0.81128 1.0

N 1 a 0.15966 0.31620 0.94069 1.0

O 1 a 0.32740 0.17832 0.44317 1.0

Ga 1 a 0.15079 0.80720 0.44621 1.0

Ga 1 a 0.34172 0.67944 0.94261 1.0

N 1 a 0.15971 0.81791 0.80141 1.0

N 1 a 0.34246 0.68414 0.30518 1.0

Zn 1 a 0.67193 0.32489 0.29757 1.0

Ga 1 a 0.83807 0.17793 0.79823 1.0

N 1 a 0.65918 0.32068 0.92002 1.0

N 1 a 0.84942 0.17930 0.44517 1.0

Ga 1 a 0.66605 0.82547 0.44187 1.0

Ga 1 a 0.83575 0.67613 0.94240 1.0

N 1 a 0.65680 0.81601 0.80424 1.0

N 1 a 0.84944 0.69902 0.29697 1.0

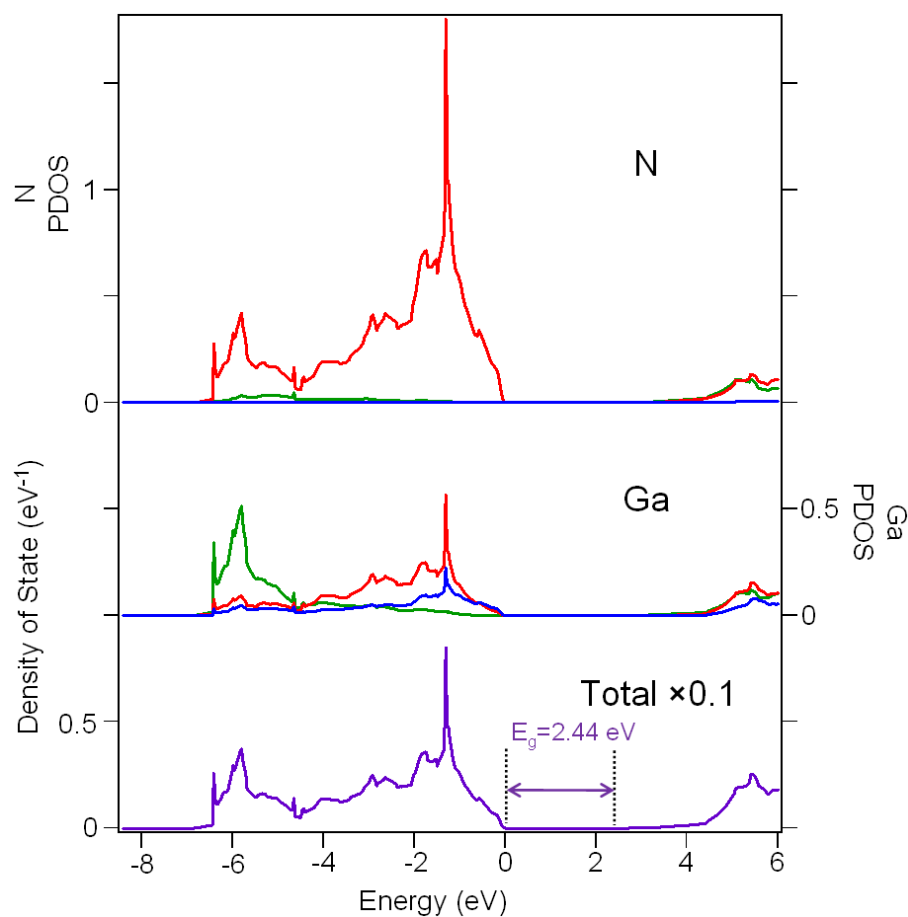

**Figure S6.** Total density of states (purple curve) and partial density of states (PDOS) of Ga and N atoms in GaN. Green, red and blue lines denote the s, p and d orbitals, respectively. These curves were obtained by the DFT calculations. The band gap 2.44 eV was estimated from the dispersion curve depicted in Fig. S8A.

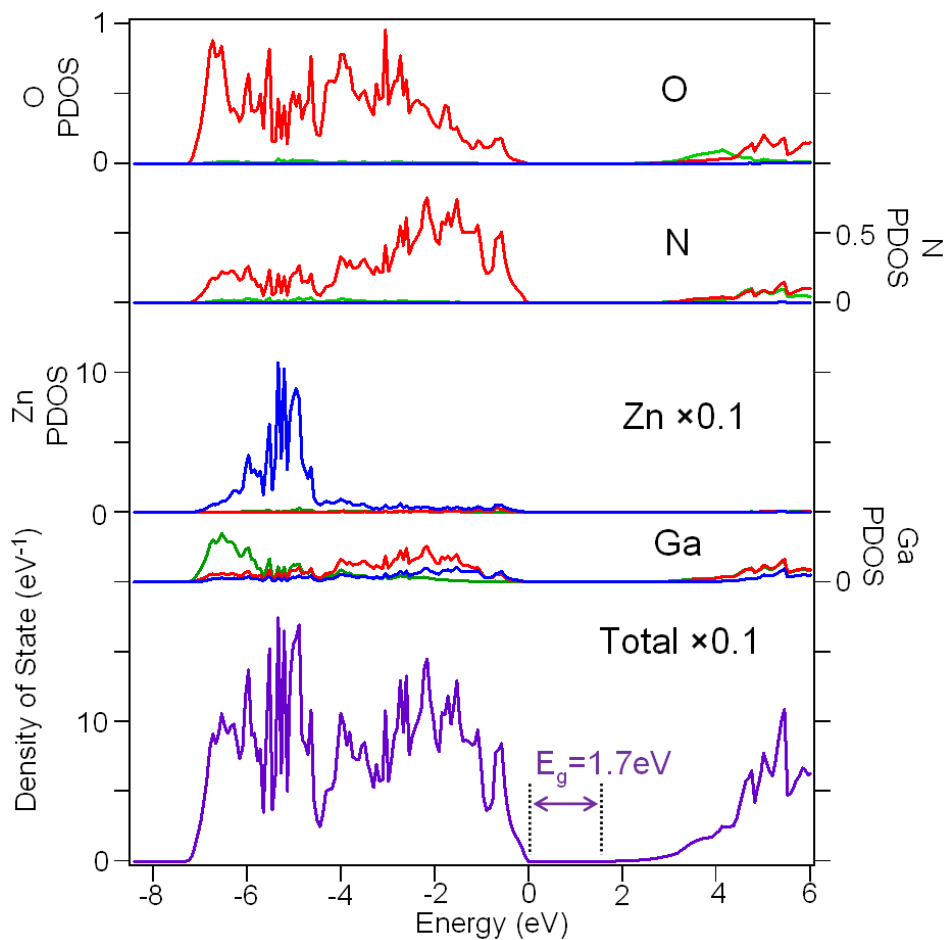

**Figure S7.** Total density of states (purple curve) and partial density of states (PDOS) of Ga, Zn, O and N atoms in  $(\text{Ga}_7\text{Zn})(\text{N}_7\text{O})$  without split anion sites. Green, red and blue lines denote the s, p and d orbitals, respectively. These curves were obtained by the DFT calculations. The band gap 1.70 eV was estimated from the dispersion curve depicted in Fig. S8B.

Electronic Supplementary Information

Authors: Masatomo Yashima, Hiroki Yamada, Kazuhiko Maeda, Kazunari Domen

Title: Experimental Visualization of Covalent Bonds and Structural Disorder in a Gallium Zinc Oxynitride Photocatalyst ( $\text{Ga}_{1-x}\text{Zn}_x(\text{N}_{1-x}\text{O}_x)$ ), Origin of Visible Light Absorption

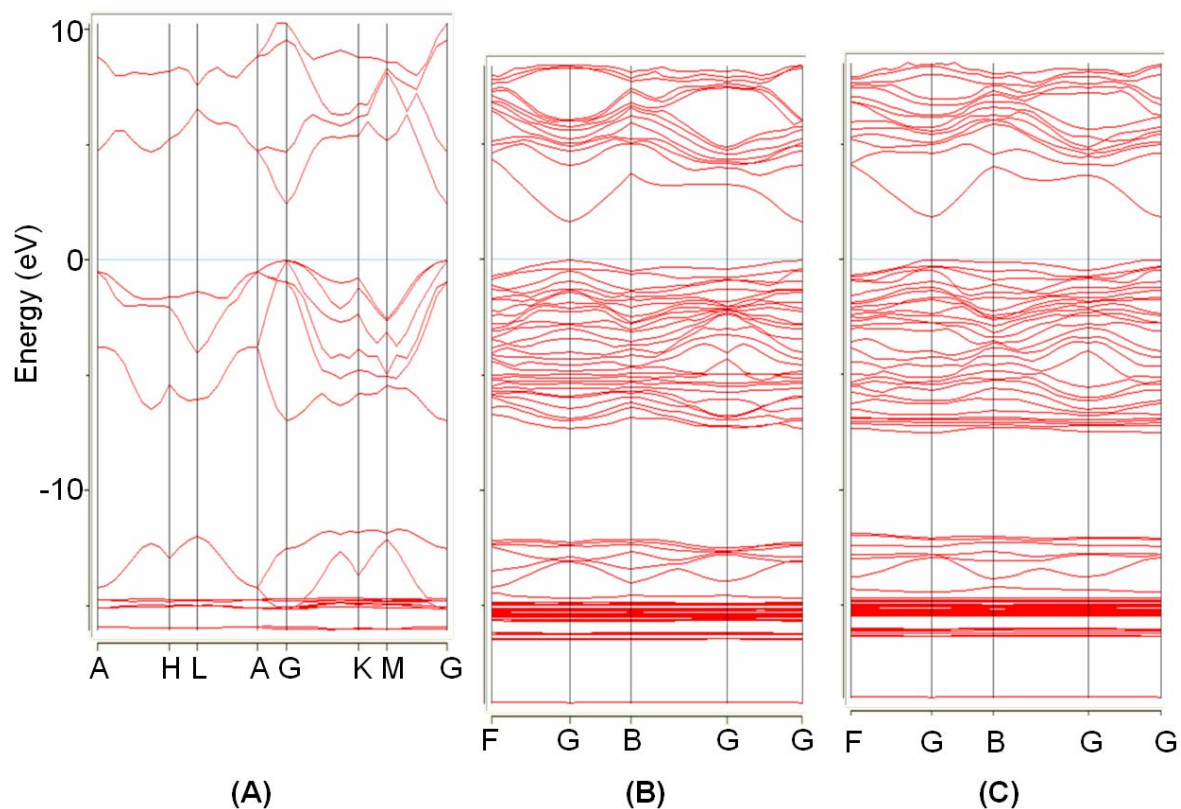

**Figure S8.** Band structures of GaN (A),  $(\text{Ga}_7\text{Zn})(\text{N}_7\text{O})$  (B) without and (C) with split anion sites. These curves were obtained by the DFT calculations.
